# Supplementary material for: Thermostability and excision activity of polymorphic forms of hOGG1
Source: PubMed Central journal article supplement (PMC6379936; doi:10.1186/s13104-019-4111-9), 2019-02-18

(A)

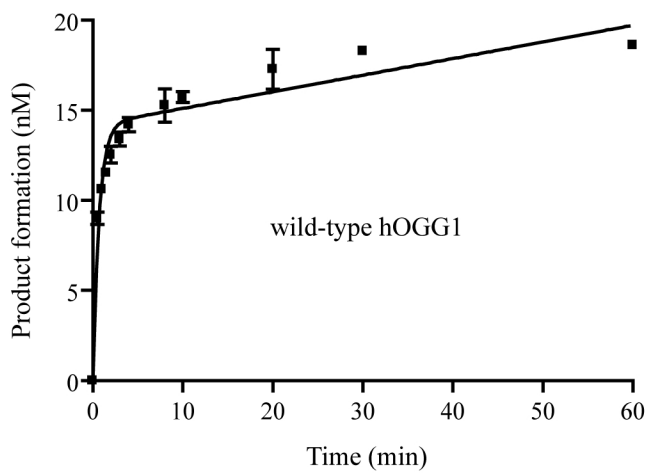

(B)

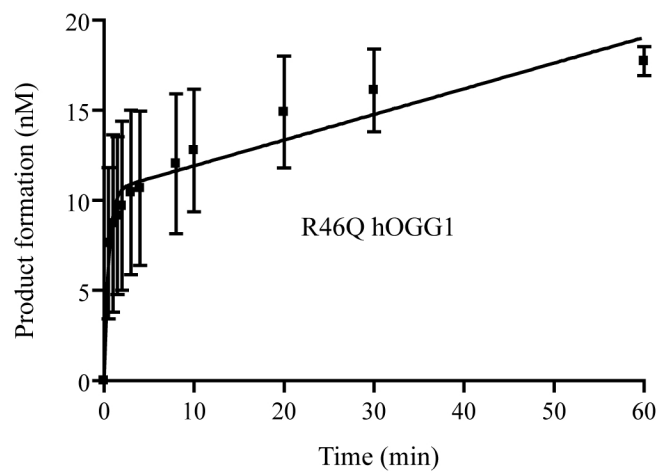

(C)

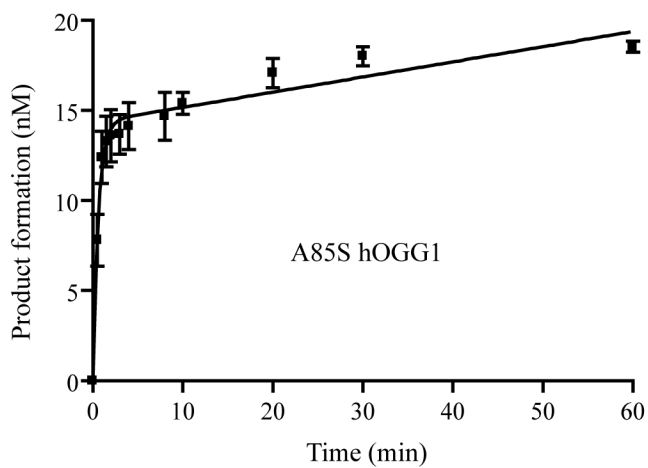

(D)

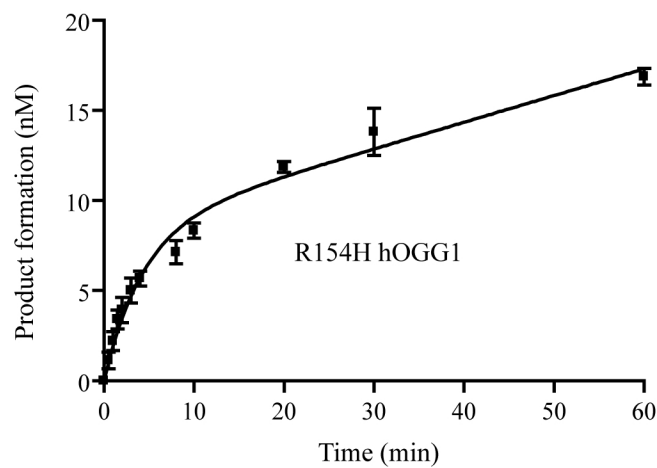

(E)

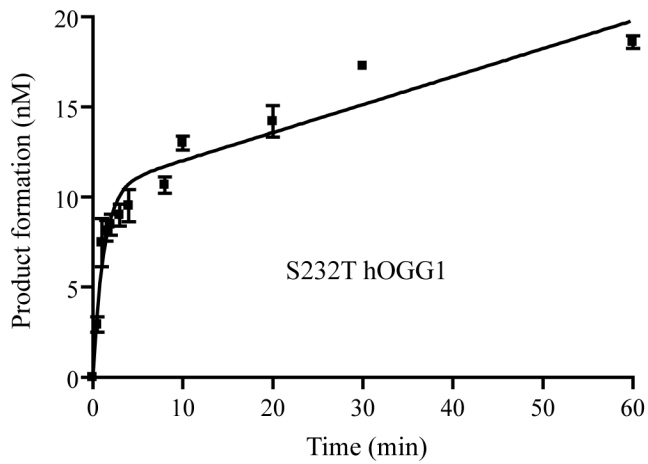

Supplement: 13104_2019_4111_MOESM3_ESM.pdf [file 13104_2019_4111_MOESM3_ESM.pdf]
