# Supplementary material for: Thermostability and excision activity of polymorphic forms of hOGG1
Source: PubMed Central journal article supplement (PMC6379936; doi:10.1186/s13104-019-4111-9), 2019-02-18
Supplement: 13104_2019_4111_MOESM5_ESM.pdf [file 13104_2019_4111_MOESM5_ESM.pdf]

## Structural analysis of the amino acid residues mutated in hOGG1 variants

| Residue | Location                                              | Primary contacts                            | Distance from oxoG <sup>1</sup> | Role        |
|---------|-------------------------------------------------------|---------------------------------------------|---------------------------------|-------------|
| Arg46   | Loop between $\alpha$ A and $\beta$ B (interior core) | Glu139 ( $\alpha$ E)<br>His179 ( $\beta$ G) | 14 Å                            | Structural  |
| Ala85   | Loop between $\beta$ E and $\alpha$ B (surface)       | Solvent                                     | 38 Å                            | Unknown     |
| Arg154  | $\alpha$ F (invades DNA helix)                        | Estranged cytosine                          | 11 Å                            | Specificity |
| Ser232  | Loop between $\alpha$ J and $\alpha$ K (surface)      | Solvent<br>Glu235( $\alpha$ K)              | 22 Å                            | Unknown     |

<sup>1</sup>Measured from closest atom in residue to C1' of deoxyribose attached to 8oxoG base
