# Supplementary material for: Thermostability and excision activity of polymorphic forms of hOGG1
Source: PubMed Central journal article supplement (PMC6379936; doi:10.1186/s13104-019-4111-9), 2019-02-18
Supplement: 13104_2019_4111_MOESM6_ESM.pdf [file 13104_2019_4111_MOESM6_ESM.pdf]



H. SAPIENS -----MPARALLPRRMGHRTLASTPALWASIPCPSELRLDLVLPSSGQ 43  
M. MULATTA -----MPARALLPRRMGHRTLASAPALWASIPCPSELRLDLVLPSSGQ 43  
B. TAURUS -----MEMSVVLLLRGSMGHRTLASFPALWASIPCPSELRLDLVLPSSGQ 45  
M. MUSCULUS -----MLFRSWLPPSSMRHRTLSSSPALWASIPCPSELRLDLVLPSSGQ 43  
R. NORVEGICUS -----MLFSSSLSSSMRHRTLSSPALWASIPCPSELRLDLVLPSSGQ 43  
A. THALIANA MKRPRPTSQPSISSTVKPPLSPPVTPILKQKLHRTGTPKWFPLKLTHTLPLTFTPTGQ 60  
D. MELANOGASTER -----MLAHLNLFHKKRLFSNMKAVLQDRGVIGLSLEECDLERTLLGGQ 44



H. SAPIENS SFRWR---EQSPAHSWGLADQVWTLTQTEELHCTVYRGDKSQASRPTPDELEAVRKYF 100  
M. MULATTA SFRWR---EQSPAHSWGLADQVWTLTQTEELHCTVYRGDKSQPGRPTPDELEAVRKYF 100  
B. TAURUS SFRWR---EQSPAHSWGLADQVWTLTQTEELHCTVYRGDKGRVGRPTLEELKAVQYF 102  
M. MUSCULUS SFRWK---EQSPAHSWGLADQVWTLTQTEEDQLYCTVYRGDQSVSRPTLEELTLHKYF 100  
R. NORVEGICUS SFRWR---EQSPAHSWGLADQVWTLTQTEEDQLYCTVYRGDKGQVGRPTLEELTLHKYF 100  
A. THALIANA TFRWK---KTGAIQYSGTIGPHLVSLRQRPDDAVSYC----VHCSTSPKSAELALLDFL 113  
D. MELANOGASTER SFRWRSICDGNRTKYGGVFNTYVWLQQEESFITYEAYG---TSSPLATKDYSSLISDYL 101



H. SAPIENS QLDVTLAQLYHHWGSVDSHFQEVAAQKFQGVRLLRQDPIECLFSFICSSNNNIARITGMVE 160  
M. MULATTA QLDVTLAQLYHHWGSVDSHFQEVAAQKFQGVRLLRQDPIECLFSFICSSNNNIARITGMVE 160  
B. TAURUS QLDVSLAPLYHHWSSVDPHFQEVAAQKFQGVRLLRQDPIECLFSFICSSNNNIARITGMVE 162  
M. MUSCULUS QLDVSLAQLYSHWASVDSHFQVAAQKFQGVRLLRQDPTCECLFSFICSSNNNIARITGMVE 160  
R. NORVEGICUS QLDVSLTQLYSHWASVDSHFQVAAQKFQGVRLLRQDPTCECLFSFICSSNNNIARITGMVE 160  
A. THALIANA NAEISLAELWSDFSKDPFRFELARHLRGARVLRQDPLECLIQFLCSSNNNIARITKMVD 173  
D. MELANOGASTER RVDFDLKVNQKDWLSKDDNFVKFLS--KPVRLLSQEPFENIFSFCLCSQNNNIKRISSMIE 159



H. SAPIENS RLCQAFGPRLIQLDVVYHGFPSLQALAGPEVEAH---LRKLGGLYRARYVSASARAILE 217  
M. MULATTA RLCQAFGPRLIQLDVVYHGFPSLQALAGPEVEAH---LRKLGGLYRARYVSASARAILE 217  
B. TAURUS RLCQTFGPRLIQLDVVYHGFPSLQALAGPEVEAQ---LRNLGLYRARFVSASARAILE 219  
M. MUSCULUS RLCQAFGPRLIQLDVVYHGFPNLHALAGPEAEETH---LRKLGGLYRARYVRSASAKAILE 217  
R. NORVEGICUS RLCQAFGPRLVQLDDVVYHGFPNLHALAGPEVETH---LRKLGGLYRARYVCASAKAILE 217  
A. THALIANA -FVSSGLHLGDIIDGFEPHFQFPLDRLS-RVSEEE---FRKAGFGYRAKYITGTVNALQA 228  
D. MELANOGASTER WFCATFGTKIGHFNADAYTFPTINRFHDI PCEDLNAQLRAAKFGYRAKFAQTLLQEIQK 219

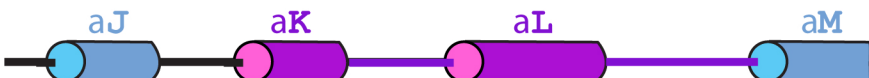

H. SAPIENS EQGG-LAWLQQLRESSYEEAHKALCILPGVGTKVADCICLMALDKPQAVPVDVHMWHIAQ 276  
M. MULATTA EQGG-LPWLQQLREAS YEEAHKALCTLPGVGTKVADCICLMALDKPQAVPVDVHIWQIAQ 276  
B. TAURUS ERGG-LPWLQQLRKAPYEEAHKALCTLPGVGTKVADCICLMALDKPQAVPVDVHVWQIAQ 278  
M. MUSCULUS EQGG-PAWLQQLRVAPYEEAHKALCTLPGVGAKVADCICLMALDKPQAVPVDVHVWQIAH 276  
R. NORVEGICUS EQGG-PAWLQQLRVAS YEEAHKALCTLPGVGTKVADCICLMALDKPQAVPVDIHWVQIAH 276  
A. THALIANA KPGGGNEWLLSLRKVELQEAVALCTLPGVGPKVAACIALFSLDQHSAPVDTHVWQIAT 288  
D. MELANOGASTER KGGQ--NWFISLKSMPFEKAREELTLLPGIGYKVADCICLMSMGHLESVPVDIHIYRIAQ 277



H. SAPIENS RDYSWHPTTSQAKGSPQTNKELGNFFRSLWGPYAGWAQAVLFSADLRQSRHAQE----P 332  
M. MULATTA RDYSWHPTTSQAKGSPQSNKELGNFFRSLWGPYAGWAQAVLFSADLHQSHRAQE----P 332  
B. TAURUS RDYSWHPTTSQAKGSPQANKELGNFFRNLWGPYAGWAQAVLFSADLRQLQQAQE----P 334  
M. MUSCULUS RDYGWHPKTSQAKGSPPLANKELGNFFRNLWGPYAGWAQAVLFSADLRQPSLSRE----P 332  
R. NORVEGICUS RDYGWQPKTSQTKGSPPLANKELGNFFRNLWGPYAGWAQAVLFSADLRQQLSRE----P 332  
A. THALIANA ---NYLLPDLGAKLT PKLHGRVAEAFVSKYGEYAGWAQTLLFIAELPAQKTLQLQSFSQP 345  
D. MELANOGASTER N--YYLPHLTGQKNVTKKIYEEVSKHFQKLHGKYAGWAQAILFSADLSQFQNTST----- 330

H. SAPIENS PAKRRKSGSKGPEG----- 345  
M. MULATTA PAKRRKSGSGLEV----- 345  
B. TAURUS PAKRRKCTGPEG----- 347  
M. MUSCULUS PAKRRKSGSKRPEG----- 345  
R. NORVEGICUS PAKRRKSGSKKTEG----- 345  
A. THALIANA INKLDESAEVNETSCDTLKP 365  
D. MELANOGASTER VACKKSKNKKPKK----- 343
